# Supplementary material
Source: publisher site journal article supplement (http://www.spandidos-publications.com/2358/downloadSupplementary)
Supplement: Supplementary file 1 [file downloadSupplementary]

## Sheet: Table SII
Table SII. Information of the mutations identified in all the plasma samples. The numbers in the time point represent the time from the baseline before radiation (days). VAF, variant allele fraction; HGVS, Human Genome Variation Society; p, amino acid change; c, DNA change.
Patient ID	Time point (days)	Gene	cHGVS	pHGVS	Function	Exon_ID	CosmicID	VAF (%)
P01	0	NF1	c.5458A>G	p.I1820V	Missense	EX38	.	0.36
P01	52	NF1	c.5458A>G	p.I1820V	Missense	EX38	.	0
P01	99	NF1	c.5458A>G	p.I1820V	Missense	EX38	.	0
P01	679	NF1	c.5458A>G	p.I1820V	Missense	EX38	.	0
P02	0	DDR2	c.461A>G	p.D154G	Missense	EX7	.	0.64
P02	0	TP53	c.844C>T	p.R282W	Missense	EX8	10704	1.12
P02	0	NOTCH1	c.185C>T	p.P62L	Missense	EX3	.	1.11
P02	0	CDKN2A	c.172C>T	p.R58*	Nonsense	EX2	12473	1.02
P02	78	DDR2	c.461A>G	p.D154G	Missense	EX7	.	0
P02	78	TP53	c.844C>T	p.R282W	Missense	EX8	10704	0.15
P02	78	NOTCH1	c.185C>T	p.P62L	Missense	EX3	.	0
P02	78	CDKN2A	c.172C>T	p.R58*	Nonsense	EX2	12473	0
P03	0	FGFR4	c.587G>A	p.R196H	Missense	EX5	.	0.44
P03	0	ERBB3	c.2023A>G	p.R675G	Missense	EX17	.	0.05
P03	93	FGFR4	c.587G>A	p.R196H	Missense	EX5	.	0
P03	93	ERBB3	c.2023A>G	p.R675G	Missense	EX17	.	0.43
P04	0	TP53	c.464T>G	p.L155R	Missense	EX5	117647	0.66
P04	0	ITM2A	c.298T>G	p.S100A	Missense	EX3	.	0.28
P04	31	TP53	c.464T>G	p.L155R	Missense	EX5	117647	0
P04	31	ITM2A	c.298T>G	p.S100A	Missense	EX3	.	0.54
P04	168	TP53	c.464T>G	p.L155R	Missense	EX5	117647	0.25
P04	168	ITM2A	c.298T>G	p.S100A	Missense	EX3	.	1.22
P05	0	CCND1	c.839A>T	p.E280V	Missense	EX5E	.	0.4
P05	0	TP53	c.215C>G	p.P72R	Missense	EX4	250061	0.26
P05	77	CCND1	c.839A>T	p.E280V	Missense	EX5E	.	0
P05	77	TP53	c.215C>G	p.P72R	Missense	EX4	250061	0
P06	0	RET	c.2071G>A	p.G691S	Missense	EX11	1666596	0.41
P06	0	ALK	c.1439G>A	p.C480Y	Missense	EX7	.	0.25
P06	0	ROS1	c.1611A>G	p.I537M	Missense	EX12	5019060	0.84
P06	0	ERBB2	c.1873A>G	p.I625V	Missense	EX20	4000121	0
P06	0	STK11	c.1062C>G	p.F354L	Missense	EX8	21360	0.04
P06	121	RET	c.2071G>A	p.G691S	Missense	EX11	1666596	0
P06	121	ALK	c.1439G>A	p.C480Y	Missense	EX7	.	0
P06	121	ROS1	c.1611A>G	p.I537M	Missense	EX12	5019060	0
P06	121	ERBB2	c.1873A>G	p.I625V	Missense	EX20	4000121	0.48
P06	121	STK11	c.1062C>G	p.F354L	Missense	EX8	21360	0.44
P07	0	PTPN11	c.565T>G	p.S189A	Missense	EX5	147613	0.76
P07	238	PTPN11	c.565T>G	p.S189A	Missense	EX5	147613	0
P08	0	EGFR	c.2024T>G	p.L675R	Missense	EX16E	.	0.32
P08	56	EGFR	c.2024T>G	p.L675R	Missense	EX16E	.	0
P08	80	EGFR	c.2024T>G	p.L675R	Missense	EX16E	.	0
P08	115	EGFR	c.2024T>G	p.L675R	Missense	EX16E	.	0
P08	229	EGFR	c.2024T>G	p.L675R	Missense	EX16E	.	0
P08	279	EGFR	c.2024T>G	p.L675R	Missense	EX16E	.	0
P09	0	NFE2L2	c.70T>C	p.W24R	Missense	EX2	10663	2.22
P09	0	TP53	c.916C>T	p.R306*	Nonsense	EX8	132985	0.69
P09	95	NFE2L2	c.70T>C	p.W24R	Missense	EX2	10663	0.18
P09	95	TP53	c.916C>T	p.R306*	Nonsense	EX8	132985	0
P10	0	FGFR2	c.763C>T	p.R255W	Missense	EX7	.	0.21
P10	0	RET	c.1531G>A	p.E511K	Missense	EX8	188542	0.15
P10	0	NOTCH1	c.1598C>T	p.A533V	Missense	EX10	.	0.44
P10	91	FGFR2	c.763C>T	p.R255W	Missense	EX7	.	0
P10	91	RET	c.1531G>A	p.E511K	Missense	EX8	188542	0
P10	91	NOTCH1	c.1598C>T	p.A533V	Missense	EX10	.	0
P10	168	FGFR2	c.763C>T	p.R255W	Missense	EX7	.	0
P10	168	RET	c.1531G>A	p.E511K	Missense	EX8	188542	0
P10	168	NOTCH1	c.1598C>T	p.A533V	Missense	EX10	.	0.08
P10	219	FGFR2	c.763C>T	p.R255W	Missense	EX7	.	0.09
P10	219	RET	c.1531G>A	p.E511K	Missense	EX8	188542	0
P10	219	NOTCH1	c.1598C>T	p.A533V	Missense	EX10	.	0
P11	0	RNF43	c.1210C>T	p.R404C	Missense	EX9	.	0.55
P11	0	ERBB4	c.884-1delG	.	Splice-3	IVS7	.	0
P12	0	NOTCH1	c.2675G>A	p.R892H	Missense	EX17	.	0.27
P12	0	CDKN2A	c.35C>T	p.S12L	Missense	EX1	.	0.2
P12	106	NOTCH1	c.2675G>A	p.R892H	Missense	EX17	.	0.04
P12	106	CDKN2A	c.35C>T	p.S12L	Missense	EX1	.	0.04
P13	0	TP53	c.320G>A	p.W107*	Nonsense	EX4	1158445	0.03
P13	0	NLRP4	c.2466A>T	p.E822D	Missense	EX7	.	0
P13	0	IRS2	c.2608G>A	p.V870M	Missense	EX1	.	0.24
P13	0	ERBB2	c.100C>T	p.R34W	Missense	EX2	.	0.21
P13	117	TP53	c.320G>A	p.W107*	Nonsense	EX4	1158445	0.35
P13	117	NLRP4	c.2466A>T	p.E822D	Missense	EX7	.	0.45
P13	117	IRS2	c.2608G>A	p.V870M	Missense	EX1	.	0.05
P13	117	ERBB2	c.100C>T	p.R34W	Missense	EX2	.	0.07
P14	0	NOTCH2	c.703A>T	p.T235S	Missense	EX4	423616	1.61
P14	45	NOTCH2	c.703A>T	p.T235S	Missense	EX4	423616	0.42
P14	92	NOTCH2	c.703A>T	p.T235S	Missense	EX4	423616	0.39
P14	182	NOTCH2	c.703A>T	p.T235S	Missense	EX4	423616	0.89
P14	272	NOTCH2	c.703A>T	p.T235S	Missense	EX4	423616	1.39
P15	0	ATM	c.3471G>C	p.L1157F	Missense	EX24	.	0.65
P15	0	CCND1	c.64C>T	p.L22F	Missense	EX1	.	0.43
P15	0	ERBB2	c.218G>A	p.R73Q	Missense	EX6	.	0.16
P15	0	TP53	c.398T>C	p.V133A	Missense	EX4	44996	1.67
P15	0	KEAP1	c.811G>A	p.V271M	Missense	EX3	1524059	1.8
P15	0	CDKN2A	c.45G>A	p.W15*	Nonsense	EX1	13625	0.84
P15	98	ATM	c.3471G>C	p.L1157F	Missense	EX24	.	0.27
P15	98	CCND1	c.64C>T	p.L22F	Missense	EX1	.	1.72
P15	98	ERBB2	c.218G>A	p.R73Q	Missense	EX6	.	0.49
P15	98	TP53	c.515T>C	p.V172A	Missense	EX5	44996	5.46
P15	98	KEAP1	c.811G>A	p.V271M	Missense	EX3	1524059	4.15
P15	98	CDKN2A	c.45G>A	p.W15*	Nonsense	EX1	13625	3.39
P16	0	RNF43	c.1210C>T	p.R404C	Missense	EX9	.	0.48
P16	310	RNF43	c.1210C>T	p.R404C	Missense	EX9	.	0
P16	453	RNF43	c.1210C>T	p.R404C	Missense	EX9	.	0.09
P17	0	NOTCH2	c.7176T>G	p.Y2392*	Nonsense	EX34E	.	0.55
P17	0	SMARCA4	c.1273C>T	p.R425W	Missense	EX9	.	0.24
P17	96	NOTCH2	c.7176T>G	p.Y2392*	Nonsense	EX34E	.	0
P17	96	SMARCA4	c.1273C>T	p.R425W	Missense	EX9	.	0
P17	195	NOTCH2	c.7176T>G	p.Y2392*	Nonsense	EX34E	.	0
P17	195	SMARCA4	c.1273C>T	p.R425W	Missense	EX9	.	0.04
P18	0	OR6F1	c.365G>A	p.R122H	Missense	EX1E	4030595	0.32
P18	31	OR6F1	c.365G>A	p.R122H	Missense	EX1E	4030595	0
P19	0	FGFR3	c.370C>T	p.R124W	Missense	EX3	.	0.25
P19	0	KRAS	c.38G>A	p.G13D	Missense	EX2	1140132	0
P19	0	APC	c.4285C>T	p.Q1429*	Nonsense	EX17E	18836	0
P19	0	PTPRD	c.4090A>G	p.I1364V	Missense	EX36	.	0
P19	92	FGFR3	c.370C>T	p.R124W	Missense	EX3	.	0.09
P19	92	KRAS	c.38G>A	p.G13D	Missense	EX2	1140132	1.15
P19	92	APC	c.4285C>T	p.Q1429*	Nonsense	EX17E	18836	1.06
P19	92	PTPRD	c.4090A>G	p.I1364V	Missense	EX36	.	0.78
P20	0	ATM	c.8090A>G	p.N2697S	Missense	EX55	.	0.88
P20	175	ATM	c.8090A>G	p.N2697S	Missense	EX55	.	1.39
P20	406	ATM	c.8090A>G	p.N2697S	Missense	EX55	.	1.68
P21	0	RB1	c.1772C>G	p.P591R	Missense	EX18	.	3.22
P21	0	TP53	c.836G>A	p.G279E	Missense	EX8	3701288	3.15
P21	0	NOTCH2	c.6892C>T	p.R2298W	Missense	EX34E	4827359	0.39
P21	0	FGFR2	c.910G>A	p.D304N	Missense	EX7	.	0
P21	0	CCND1	c.839A>T	p.E280V	Missense	EX5E	.	0.91
P21	0	ERBB4	c.2254A>G	p.I752V	Missense	EX19	.	0
P21	125	RB1	c.1772C>G	p.P591R	Missense	EX18	.	0
P21	125	TP53	c.836G>A	p.G279E	Missense	EX8	3701288	0
P21	125	NOTCH2	c.6892C>T	p.R2298W	Missense	EX34E	4827359	0.55
P21	125	FGFR2	c.910G>A	p.D304N	Missense	EX7	.	0.59
P21	125	CCND1	c.839A>T	p.E280V	Missense	EX5E	.	0.51
P21	125	ERBB4	c.2254A>G	p.I752V	Missense	EX19	.	0.93
P21	180	RB1	c.1772C>G	p.P591R	Missense	EX18	.	0.14
P21	180	TP53	c.836G>A	p.G279E	Missense	EX8	3701288	0.08
P21	180	NOTCH2	c.6892C>T	p.R2298W	Missense	EX34E	4827359	0.04
P21	180	FGFR2	c.910G>A	p.D304N	Missense	EX7	.	0.2
P21	180	CCND1	c.839A>T	p.E280V	Missense	EX5E	.	0.2
P21	180	ERBB4	c.2254A>G	p.I752V	Missense	EX19	.	0.49
P22	0	TP53	c.742C>T	p.R248W	Missense	EX7	10656	0.54
P22	43	TP53	c.742C>T	p.R248W	Missense	EX7	10656	0.71
P22	113	TP53	c.742C>T	p.R248W	Missense	EX7	10656	0.4
P23	0	TP53	c.407G>A	p.R136H	Missense	EX4	10648	0.77
P23	174	TP53	c.407G>A	p.R136H	Missense	EX4	10648	0.11
P24	0	TP53	c.221T>G	p.F74C	Missense	EX3	10717	0.31
P24	51	TP53	c.221T>G	p.F74C	Missense	EX3	10717	0
P25	0	DDR2	c.1418G>A	p.R473H	Missense	EX13	1648427	0.44
P25	0	SMO	c.880G>A	p.V294I	Missense	EX4	.	0
P25	0	NOTCH1	c.6700C>G	p.L2234V	Missense	EX34E	.	0.59
P25	0	RB1	c.784C>T	p.R262W	Missense	EX8	.	0.73
P25	43	DDR2	c.1418G>A	p.R473H	Missense	EX13	1648427	0.31
P25	43	SMO	c.880G>A	p.V294I	Missense	EX4	.	0.08
P25	43	NOTCH1	c.6700C>G	p.L2234V	Missense	EX34E	.	0.27
P25	43	RB1	c.784C>T	p.R262W	Missense	EX8	.	0
P25	79	DDR2	c.1418G>A	p.R473H	Missense	EX13	1648427	0.19
P25	79	SMO	c.880G>A	p.V294I	Missense	EX4	.	0.04
P25	79	NOTCH1	c.6700C>G	p.L2234V	Missense	EX34E	.	0.04
P25	79	RB1	c.784C>T	p.R262W	Missense	EX8	.	0.14
P25	166	DDR2	c.1418G>A	p.R473H	Missense	EX13	1648427	0.12
P25	166	SMO	c.880G>A	p.V294I	Missense	EX4	.	0
P25	166	NOTCH1	c.6700C>G	p.L2234V	Missense	EX34E	.	0.06
P25	166	RB1	c.784C>T	p.R262W	Missense	EX8	.	0.15
P25	261	DDR2	c.1418G>A	p.R473H	Missense	EX13	1648427	0.04
P25	261	SMO	c.880G>A	p.V294I	Missense	EX4	.	0.6
P25	261	NOTCH1	c.6700C>G	p.L2234V	Missense	EX34E	.	0.08
P25	261	RB1	c.784C>T	p.R262W	Missense	EX8	.	0
* indicates no amino acids was translated due to the truncated mutation.
. indicates this mutation was not reported by COSMIC.
